# Supplementary material
Source: Springer Nature journal article supplement (http://www.springermedizin.de/resource/supplementary/13027_2009_159_MOESM4_ESM.pdf/25656606)

**A**

**1. Complete E6-1 amplification mixtures**  
 $2.5 \times 10^6$  initial copies of pHV101, LCRS/E7AS primers

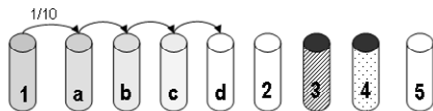

**2. E6-1 "preamplification"**  
 15 cycles

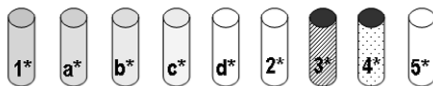

**3. E6-2 "nested" qPCR**  
 pU1M/pU1R primers, 1/50 volume of preamplified mixtures

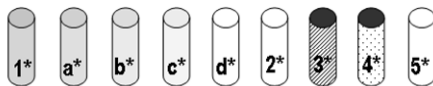**B**

**1. Minimum E6-1 amplification mixtures**  
 15 cycles, LCRS/E7AS primers

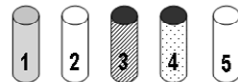

**2a. E6-1 "preamplification"**  
 15 cycles, LCRS/E7AS primers

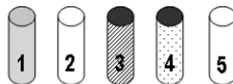

**2b. Dilution of preamplified calibration mixture**  
 $2.5 \times 10^6$  initial copies of pHV101

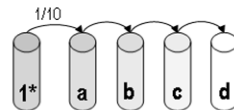

**3. E6-2 amplification ("nested qPCR")**  
 pU1M/pU1R primers, 1/50 volume of preamplified mixtures

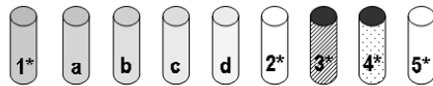

Supplement: MOESM4 [file 25656606]
